# Supplementary material for: Red blood cell transfusions impact response rates to immunotherapy in patients with solid malignant tumors
Source: PubMed Central journal article supplement (PMC9492841; doi:10.3389/fimmu.2022.976011), 2022-09-08
Supplement: DataSheet_1.pdf [file DataSheet_1.pdf]

## Supplementary material

### Supplementary Table

**Supplementary Table 1 Patient characteristics of transfused and non-transfused patients (30 days before IT start)**

|                                         | <b>total</b><br>(N = 55), n (%) | <b>RBC transfusion</b><br>(N = 9), n (%) | <b>no RBC transfusion</b><br>(N = 46), n (%) | <b>p-value<sup>a</sup></b> |
|-----------------------------------------|---------------------------------|------------------------------------------|----------------------------------------------|----------------------------|
| <b>age (years)</b>                      |                                 |                                          |                                              |                            |
| mean                                    | 62                              | 55                                       | 64                                           | 0.094*                     |
| range                                   | 34-90                           | 35-76                                    | 34-90                                        |                            |
| elderly (>70)                           | 15 (27.3)                       | 2 (22.2)                                 | 13 (28.3)                                    | 1.000                      |
| <b>gender</b>                           |                                 |                                          |                                              | 1.000                      |
| male                                    | 39 (70.9)                       | 7 (77.8)                                 | 32 (69.6)                                    |                            |
| female                                  | 16 (29.1)                       | 2 (22.2)                                 | 14 (30.4)                                    |                            |
| <b>ECOG</b>                             |                                 |                                          |                                              | 1.000                      |
| 0-1                                     | 35 (63.6)                       | 6 (66.7)                                 | 29 (63.0)                                    |                            |
| ≥2                                      | 17 (30.9)                       | 3 (33.3)                                 | 14 (30.4)                                    |                            |
| <b>primarius</b>                        |                                 |                                          |                                              | 0.421                      |
| lung                                    | 19 (34.5)                       | 3 (33.3)                                 | 16 (34.8)                                    |                            |
| skin                                    | 7 (12.7)                        | 0 (0)                                    | 7 (15.2)                                     |                            |
| head neck                               | 10 (18.2)                       | 3 (33.3)                                 | 7 (15.2)                                     |                            |
| urogenital                              | 5 (9.1)                         | 0 (0)                                    | 5 (10.9)                                     |                            |
| CUP                                     | 4 (7.3)                         | 0 (0)                                    | 4 (8.7)                                      |                            |
| breast                                  | 3 (5.5)                         | 1 (11.1)                                 | 2 (4.3)                                      |                            |
| others                                  | 7 (12.7)                        | 2 (22.2)                                 | 5 (10.9)                                     |                            |
| <b>one drug immunotherapy</b>           |                                 |                                          |                                              | 1.000                      |
| Atezolizumab                            | 8 (14.5)                        | 3 (33.3)                                 | 5 (10.9)                                     |                            |
| Pembrolizumab/Nivolumab                 | 34 (61.8)                       | 4 (44.4)                                 | 30 (65.2)                                    |                            |
| Ipilimumab                              | 1 (1.8)                         | 0 (0)                                    | 1 (2.2)                                      |                            |
| <b>two drug immunotherapy</b>           |                                 |                                          |                                              |                            |
| Nivolumab+Ipilimumab                    | 12 (21.8)                       | 2 (22.2)                                 | 10 (21.7)                                    |                            |
| <b>additional therapy</b>               |                                 |                                          |                                              |                            |
| additional chemotherapy                 | 15 (27.3)                       | 4 (44.4)                                 | 11 (23.9)                                    | 0.236                      |
| additional radiotherapy                 | 11 (20.0)                       | 3 (33.3)                                 | 8 (17.4)                                     | 0.362                      |
| <b>line of therapy</b>                  |                                 |                                          |                                              | 0.166                      |
| 1                                       | 14 (25.5)                       | 3 (33.3)                                 | 11 (23.9)                                    |                            |
| 2                                       | 15 (27.3)                       | 0 (0)                                    | 15 (32.6)                                    |                            |
| 3                                       | 13 (23.6)                       | 4 (44.4)                                 | 9 (19.6)                                     |                            |
| 4                                       | 5 (9.1)                         | 1 (11.1)                                 | 4 (8.7)                                      |                            |
| ≥5                                      | 8 (14.5)                        | 1 (11.1)                                 | 7 (15.2)                                     |                            |
| mean                                    | 2.7                             | 2.7                                      | 2.7                                          |                            |
| <b>number of organs with metastasis</b> |                                 |                                          |                                              | 0.070*                     |
| mean                                    | 1.7                             | 2.3                                      | 1.7                                          |                            |
| <b>LDH</b>                              |                                 |                                          |                                              | 0.051*                     |
| mean                                    | 317                             | 704                                      | 238                                          |                            |

<sup>a</sup>was calculated using Fisher's exact/\*Wilcoxon

RBC = red blood cell, CUP = cancer of unknown primary
